# Supplementary material
Source: MDPI journal article supplement (https://www.mdpi.com/2075-5309/14/5/1388)
Supplement: s1 [file s1]

---

**Table S1.** ENVI-met simulation file input values for Relative Humidity (RH) and air temperature.

| Time     | Air Temperature (°C) | Relative Humidity (%) |
|----------|----------------------|-----------------------|
| 12:00 AM | 26.89                | 60.27                 |
| 1:00 AM  | 26.67                | 60.86                 |
| 2:00 AM  | 26.22                | 60.95                 |
| 3:00 AM  | 26.21                | 62.34                 |
| 4:00 AM  | 25.92                | 62.74                 |
| 5:00 AM  | 25.79                | 63.41                 |
| 6:00 AM  | 26.07                | 62.63                 |
| 7:00 AM  | 27.41                | 58.26                 |
| 8:00 AM  | 28.98                | 51.56                 |
| 9:00 AM  | 30.42                | 45.59                 |
| 10:00 AM | 31.64                | 41.33                 |
| 11:00 AM | 32.28                | 38.35                 |
| 12:00 PM | 32.87                | 37.37                 |
| 1:00 PM  | 32.84                | 37.10                 |
| 2:00 PM  | 32.49                | 38.44                 |
| 3:00 PM  | 32.05                | 40.96                 |
| 4:00 PM  | 31.16                | 44.17                 |
| 5:00 PM  | 30.02                | 48.45                 |
| 6:00 PM  | 29.20                | 52.52                 |
| 7:00 PM  | 28.52                | 55.38                 |
| 8:00 PM  | 28.10                | 56.86                 |
| 9:00 PM  | 27.78                | 58.18                 |
| 10:00 PM | 27.51                | 58.98                 |
